# Supplementary material for: pH-Responsive nanofiber buttresses as local drug delivery devices
Source: Royal Society of Chemistry journal article supplement (doi:10.1039/d2bm01199a), 2022-11-16
Supplement: d2bm01199a2.pdf [file d2bm01199a2.pdf]

## *pH-Responsive Nanofiber Buttresses as Local Drug Delivery Devices*

*Ismail Altinbasak,<sup>a</sup> Salli Kocak,<sup>a</sup> Aaron H. Colby,<sup>c</sup> Yasin Alp,<sup>a</sup> Rana Sanyal,<sup>a,b</sup>*

*Mark W. Grinstaff<sup>c,d\*</sup> and Amitav Sanyal,<sup>a,b\*</sup>*

<sup>a</sup> Department of Chemistry, Bogazici University, Bebek, Istanbul 34342, Turkey

<sup>b</sup> Center for Life Sciences and Technologies, Bogazici University, Bebek, Istanbul 34342, Turkey

<sup>c</sup> Boston University, Department of Biomedical Engineering, Boston, MA, United States of America

<sup>d</sup> Boston University, Department of Chemistry, Boston, MA, United States of America

|                                                                                                                                                                             |   |
|-----------------------------------------------------------------------------------------------------------------------------------------------------------------------------|---|
| <b>Figure S1.</b> SEC traces of polymers (eluent: DMAC).....                                                                                                                | 2 |
| <b>Figure S2.</b> <sup>1</sup> H NMR spectrum of polymer.....                                                                                                               | 2 |
| <b>Figure S3.</b> The release of fluorescein amine from nanofiber buttresses as a function of fiber diameter and time while incubated in pH 7.4 aqueous buffer (N=3).....   | 3 |
| <b>Figure S4.</b> Digital images of doxorubicin loaded nanofiber buttresses before and after release at pH 5.5 (acetate buffer), 6.5 and 7.4 in RPMI-HEPES cell medium..... | 3 |
| <b>Figure S5.</b> Long term release of doxorubicin from nanofibers incubated at pH 7.4.....                                                                                 | 4 |
| <b>Figure S6.</b> Doxorubicin release from nanofibers at pH 6.5 phosphate buffer.....                                                                                       | 4 |
| <b>Figure S7.</b> Cytotoxicity of buttress degradation components in 3T3 fibroblasts over three days.....                                                                   | 5 |
| <b>Figure S8.</b> Video showing submersion of a resected, pH-responsive nanofiber buttress reinforced, inflated, porcine-lung in water with no air leaks.....               | 5 |

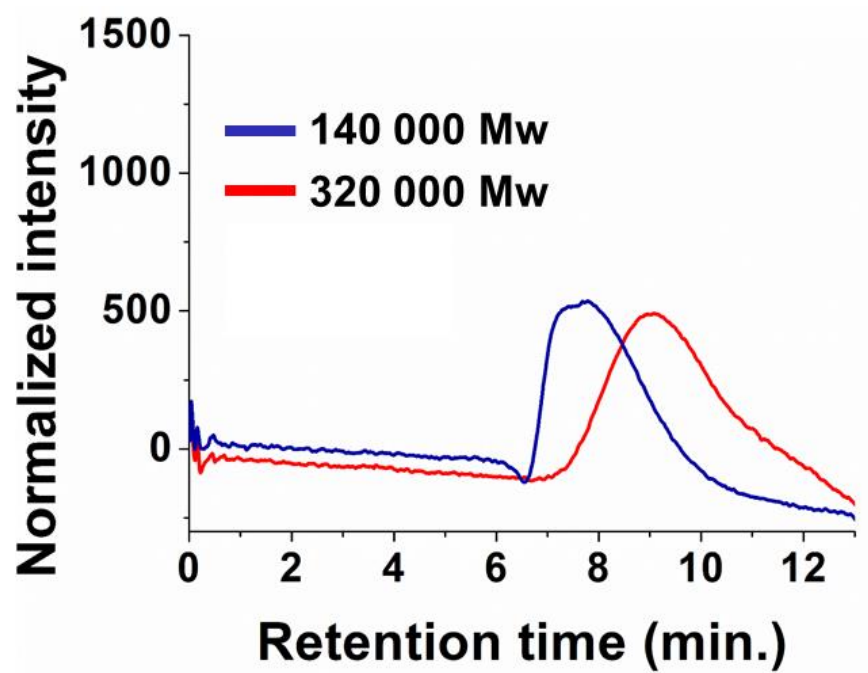

Figure S1. SEC traces of polymers (eluent: DMAC).

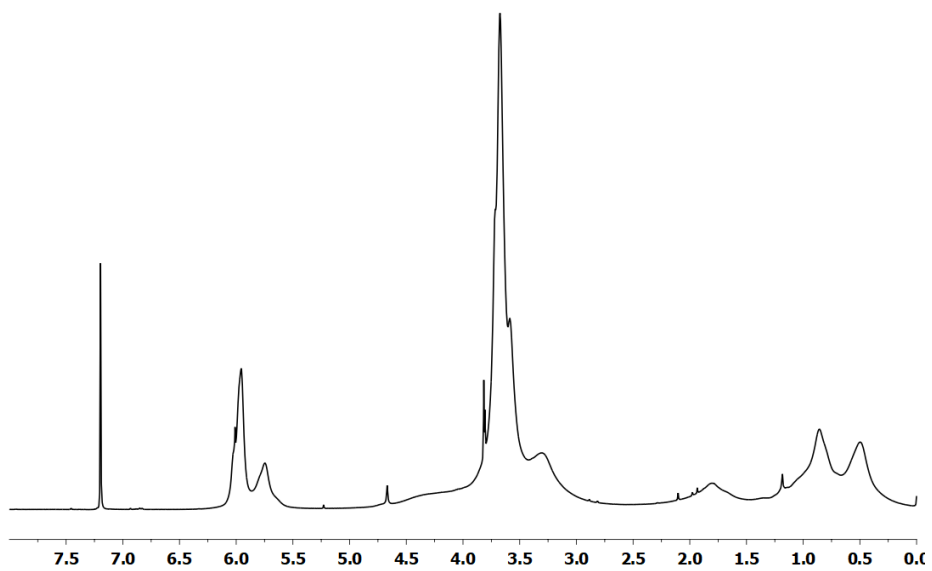

Figure S2.  $^1\text{H}$  NMR spectrum of polymer.

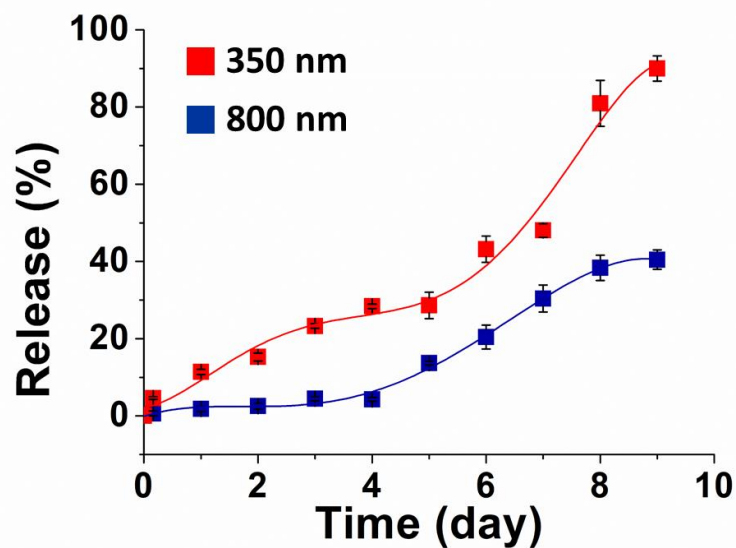

**Figure S3.** The release of fluorescein amine from nanofiber buttresses as a function of fiber diameter and time while incubated in pH 7.4 aqueous buffer (N=3).

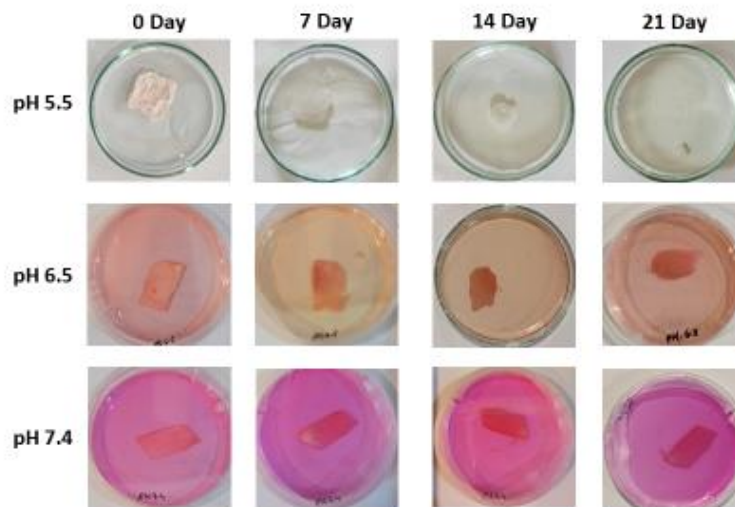

**Figure S4.** Digital images of doxorubicin loaded nanofiber buttresses before and after release at pH 5.5 (acetate buffer), 6.5 and 7.4 in RPMI-HEPES cell medium.

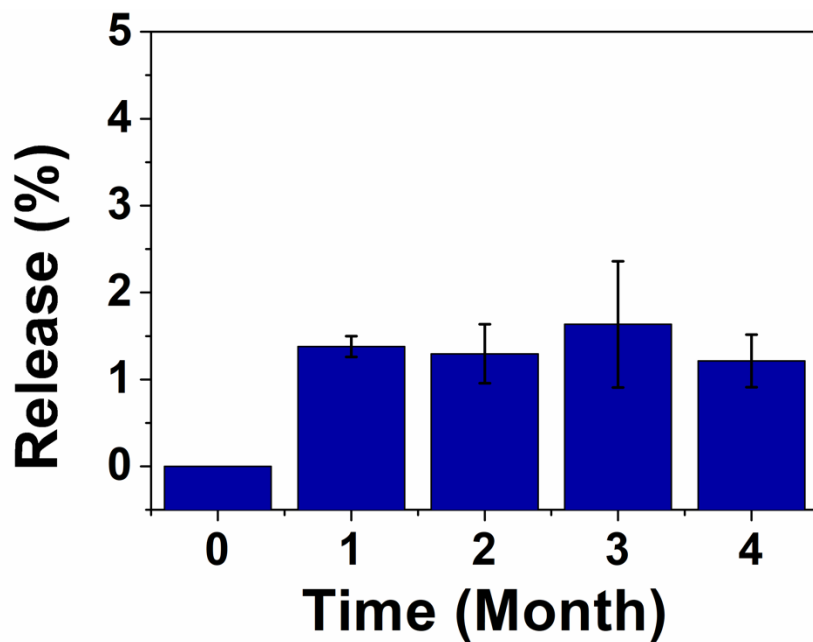

Figure S5. Long term release of doxorubicin from nanofibers incubated at pH 7.4.

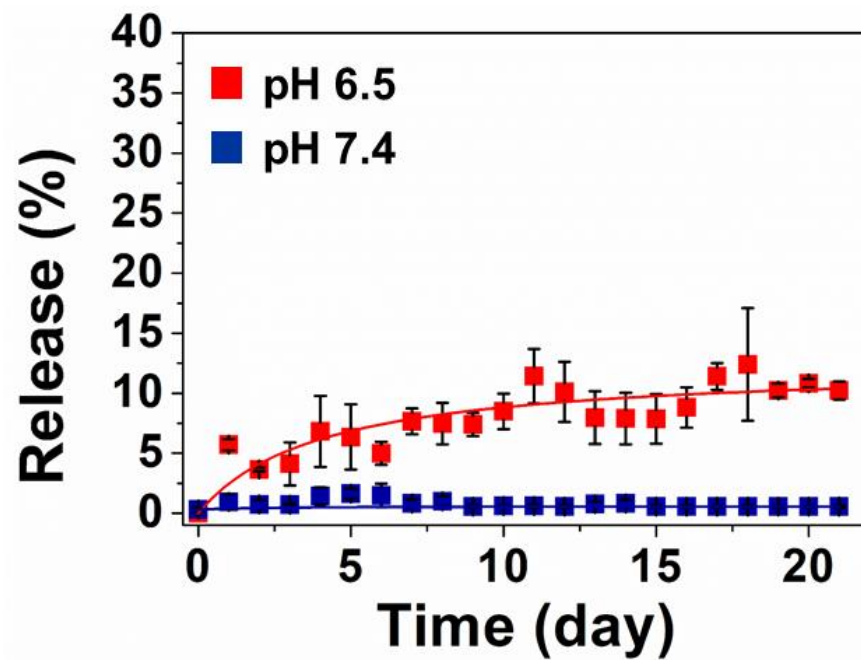

Figure S6. Doxorubicin release from nanofibers at pH 6.5 phosphate buffer.

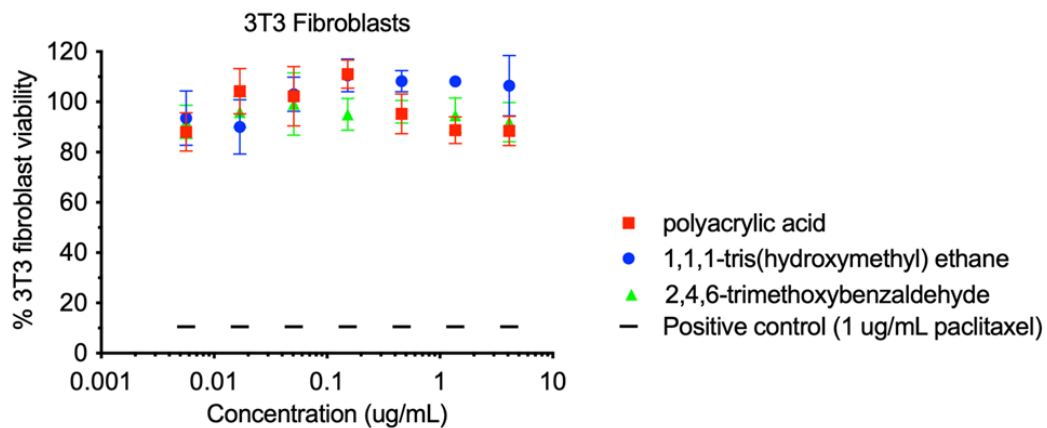

**Figure S7.** Cytotoxicity of buttress degradation components in 3T3 fibroblasts over three days.

**Figure S8.** Video showing submersion of a resected, pH-responsive nanofiber buttress reinforced, inflated, porcine-lung in water with no air leaks.
